# Supplementary material
Source: publisher site journal article supplement (https://www.dovepress.com/article/572336)
Supplement: Supplementary file 1 [file 572336_Supplementary%20Tables.docx]

**Supplementary Table 1** Demographic distribution of the ASD group and the control group

|  | Group M (*P25, P75*)  | | Mann-Whitney test statistic U-value | Mann-Whitney test statistic z-value | *P* value |
| --- | --- | --- | --- | --- | --- |
| Control group (n = 96) | ASD group (n = 95) |
| Age | 7 (6.0, 10.0) | 8 (6.0, 10.0) | 4499.5 | -0.160 | 0.873 |
| Gender | 1 (1.0, 2.0) | 1 (1.0, 2.0) | 4383 | -0.588 | 0.557 |

**Note:** The two groups of data show no statistical difference in children's age and gender (all *p* values > 0.05).

**Supplementary Table 2** Refractive status of the ASD group and the control group

|  | Group M (*M ±Q*) | | Mann-Whitney test statistic U value | Mann-Whitney test statistic z value | *p* value |
| --- | --- | --- | --- | --- | --- |
| Control group (n = 96) | ASD group (n = 95) |
| SPH | -0.25 ±2.10 | 0.25 ±1.10 | 2685.5 | -4.936 | **0.000**** |
| CYL | -0.50 ±0.50 | -0.75 ±1.50 | 3523.0 | -2.744 | **0.006**** |
| SE | -0.50 ±1.80 | 0.00 ±1.30 | 3264.5 | -3.400 | **0.001**** |

**Note:** ** *p*<0.01: Values in bold indicate statistical significance at *p*<0.01.

Date are presented as mean ± SD (diopter,D). SPH, spherical; CYL, cylindrical; SE,spherical equivalent. Statistical comparisons were performed using the Mann-Whitney U test. *p*<0.01 vs. control group (ASD group n= 95, control group n=96).

**Supplementary Table 3** ROC results AUC summary

| Item | AUC | Standard error | *p* | 95% CI |
| --- | --- | --- | --- | --- |
| Combined diagnoses | 0.741 | 0.036 | **0.000**** | 0.669 ~ 0.812 |
| CYL | 0.386 | 0.043 | **0.008**** | 0.301 ~ 0.471 |
| SE | 0.644 | 0.040 | **0.001**** | 0.565 ~ 0.723 |
| AL/CR | 0.439 | 0.042 | 0.156 | 0.356 ~ 0.523 |
| ACD | 0.409 | 0.042 | **0.033*** | 0.327 ~ 0.491 |

**Note:** * *p*<0.05: Values in bold indicate statistical significance at p<0.05,** p<0.01: Values in bold indicate statistical significance at p<0.01.

Data are presented as area under the curve (AUC) with 95% confidence interval (CI). P values were calculated for the AUC comparison. Individual factors (CYL, SE, ASD): Each showed statistical significance (*p*<0.05), but with suboptimal AUC values. Combined model: AUC = 0.741 (*p*<0.01, 95% CI: 66.94%–81.19%). Bold indicates statistical significance at *p*<0.05. The combined diagnostic approach demonstrated significantly better performance in identifying ASD risk than any single factor alone.

**Supplementary Table 4** Machine learning model evaluation effectiveness

| Parameter | Random Forest Model | Support Vector Machine Model | KNN Model | Decision Tree Model | Naive Bayes Model |
| --- | --- | --- | --- | --- | --- |
| Accuracy rate | 75.000% | 75.000% | 73.214% | 67.857% | 62.500% |
| Precision (Overall) | 75.000% | 75.255% | 73.278% | 68.553% | 63.999% |
| Recall (Comprehensive) | 75.000% | 75.000% | 73.214% | 67.857% | 62.500% |
| f1-score | 0.750 | 0.750 | 0.730 | 0.679 | 0.622 |

**Note:** The evaluation effect of five models combined with the confusion matrix of the test set shows that the Random Forest model has a relatively stable performance.

**Supplementary Table 5** Random Forest Model weight analysis results

| Item | weight value |
| --- | --- |
| CYL | 0.2484 |
| AL/CR | 0.2437 |
| ACD | 0.2528 |
| SE | 0.2550 |

**Note:** Feature weights indicate the importance of each title to the model's contribution, with their sum equaling 1. From the table above, it is clear that: SE accounts for 25.50% of the weight, which is the highest, playing a key role in the model construction; ACD accounts for 25.28% of the weight, the importance of which comes next, playing a significant role in the model construction.
